# Supplementary material for: Electronic doping-enabled transition from n- to p-type conductivity over Au@CdS core–shell nanocrystals toward unassisted photoelectrochemical water splitting
Source: Royal Society of Chemistry journal article supplement (doi:10.1039/c9ta08766d), 2019-01-01
Supplement: c9ta08766d1.pdf [file c9ta08766d1.pdf]

## Supporting Information

### **Electronic doping-enabled transition from n- to p-type conductivity over Au@CdS core-shell nanocrystals toward unassisted photoelectrochemical water splitting**

Rongrong Pan, Jia Liu,\* Yuemei Li, Xinyuan Li, Erhuan Zhang, Qiumei Di, Mengyao Su and Jiatao Zhang\*

Beijing Key Laboratory of Construction Tailorable Advanced Functional Materials and Green Applications, School of Materials Science and Engineering, Beijing Institute of Technology, Beijing 100081, China

## Supplementary Data

**Table S1.** The elemental compositions of the Au@CdS core-shell HNCs derived from Au@Ag<sub>2</sub>S core-shell HNCs by cation exchange. The addition amounts of Cd(NO<sub>3</sub>)<sub>2</sub>·4H<sub>2</sub>O and TBP during the Cd<sup>2+</sup>-for-Ag<sup>+</sup> cation exchange process were varied for Au@CdS-1 and Au@CdS-2 (Specifically, 0.25 g of Cd(NO<sub>3</sub>)<sub>2</sub>·4H<sub>2</sub>O and 100 μL of TBP for Au@CdS-1; 0.03 g of Cd(NO<sub>3</sub>)<sub>2</sub>·4H<sub>2</sub>O and 50 μL of TBP for Au@CdS-2). Determined by XPS analysis.

| Sample   | Atomic concentration<br>(S2p, %) | Atomic concentration<br>(Ag3d, %) | Atomic concentration<br>(Cd3d, %) |
|----------|----------------------------------|-----------------------------------|-----------------------------------|
| Au@CdS-1 | 49.2                             | 1.9                               | 48.9                              |
| Au@CdS-2 | 47.7                             | 8.7                               | 43.6                              |

**Table S2.** The elemental compositions of the Cu-doped Au@CdS core-shell HNCs determined by XPS analysis.

| Sample          | Atomic concentration<br>(S2p, %) | Atomic concentration<br>(Cu2p, %) | Atomic concentration<br>(Cd3d, %) |
|-----------------|----------------------------------|-----------------------------------|-----------------------------------|
| Cu(6.3)-Au@CdS  | 54.6                             | 6.3                               | 39.1                              |
| Cu(14.7)-Au@CdS | 47.5                             | 14.7                              | 37.8                              |
| Cu(16.6)-Au@CdS | 45.5                             | 16.6                              | 37.9                              |
| Cu(18.9)-Au@CdS | 41.2                             | 18.9                              | 39.9                              |

**Table S3.** Summarization of the conductivity type, carrier density, and flat band potential of undoped and Cu-doped Au@CdS core-shell HNCs with different dopant concentration. Determined by the Mott-Schottky equation.

| Sample           | Type | N (cm <sup>-3</sup> ) | Flat band potential (V vs RHE) |
|------------------|------|-----------------------|--------------------------------|
| Au@CdS           | n    | 1.7x10 <sup>19</sup>  | -0.08                          |
| Cu(6.3)-Au@CdS   | n    | 9.7x10 <sup>18</sup>  | 0.27                           |
| Cu(14.7)-Au@CdS  | p    | 1.7x10 <sup>19</sup>  | 1.87                           |
| Cu(16.6)-Au@CdS  | p    | 2.1x10 <sup>19</sup>  | 1.91                           |
| Cu(18.9)- Au@CdS | p    | 8.8x10 <sup>19</sup>  | 1.99                           |

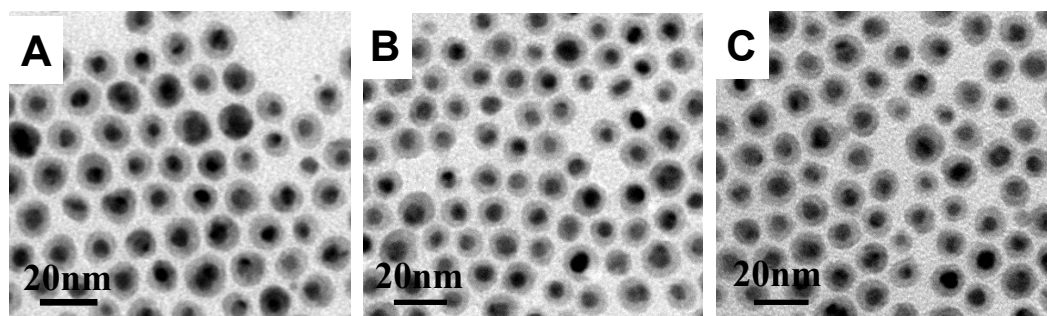

**Fig. S1.** TEM images of pristine Au@CdS core-shell HNCs (A), Au@Cu<sub>2</sub>S core-shell HNCs (B) and Cu-doped Au@CdS core-shell HNCs (C).

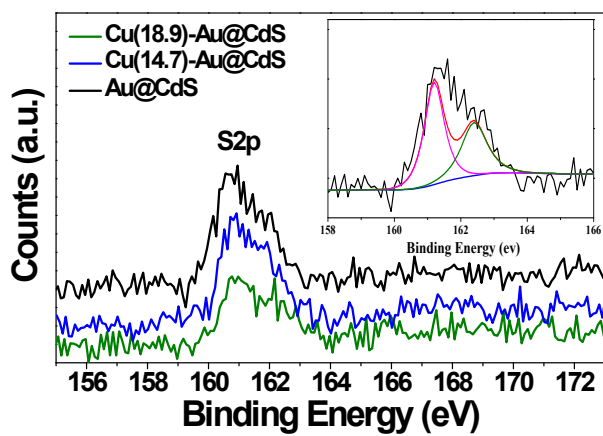

**Fig. S2.** XPS spectra of S2p for the undoped and Cu-doped Au@CdS core-shell HNCs.

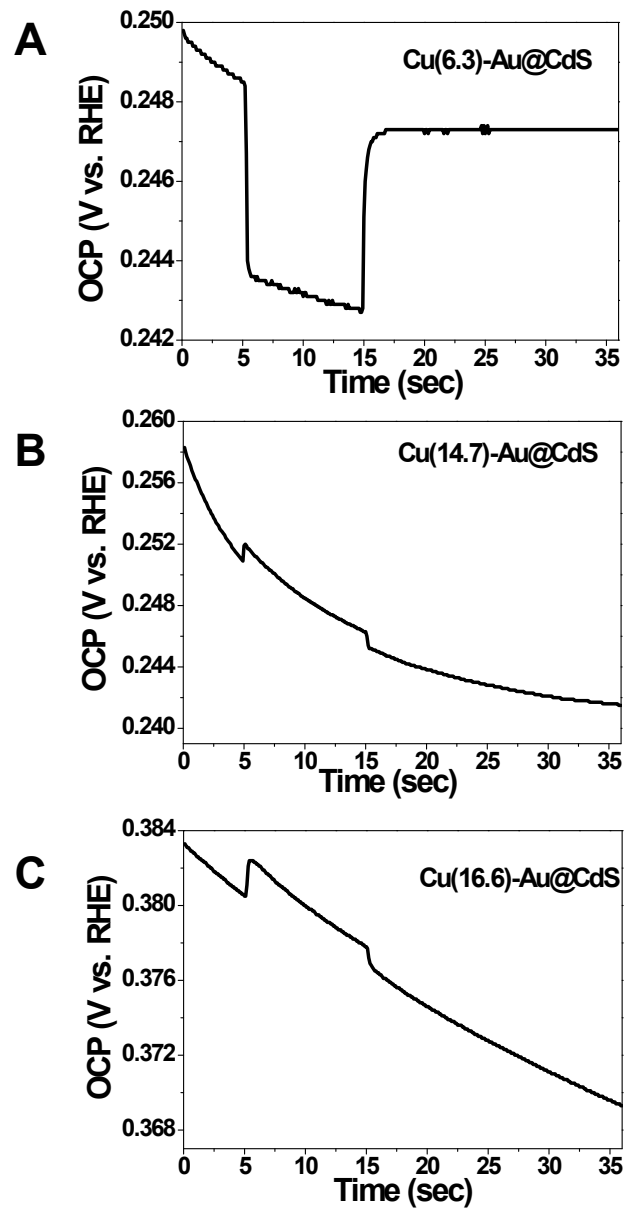

**Fig. S3.** OCP responses of the Cu-doped Au@CdS core-shell HNCs with different dopant concentrations under illumination and in the dark. (A) Cu(6.3)-Au@CdS, (B) Cu(14.7)-Au@CdS, and (C) Cu(16.6)-Au@CdS.

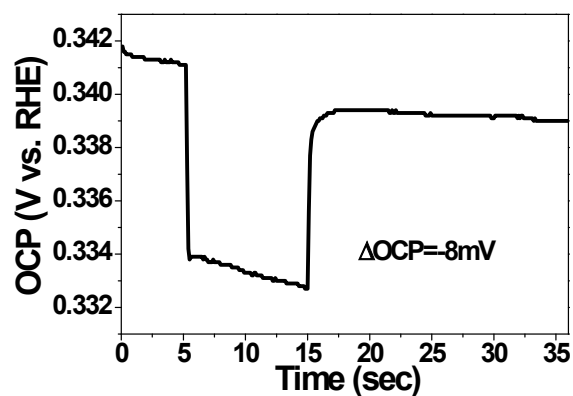

**Fig. S4.** OCP response of Cu-doped Au@CdS with notable Ag impurities in the shell matrix. Specifically, here Au@CdS-2 HNCs were adopted as the starting materials, which were prepared from Au@Ag<sub>2</sub>S core-shell HNCs by incomplete cation exchange involving the usage of 0.03 g of Cd(NO<sub>3</sub>)<sub>2</sub>·4H<sub>2</sub>O and 50  $\mu$ L of TBP (Table S1). Although the reaction conditions for subsequent synthesis were the same as those for Cu(18.9)-Au@CdS core-shell HNCs, the  $\Delta\text{OCP}$  value of this sample was still highly negative indicating the n-type conductivity. This was probably ascribed to the existence of the Ag impurities in the shell matrix, suggesting that the full removal of the Ag ions from the shell is a prerequisite for switching the conductivity type from n to p for the final products.

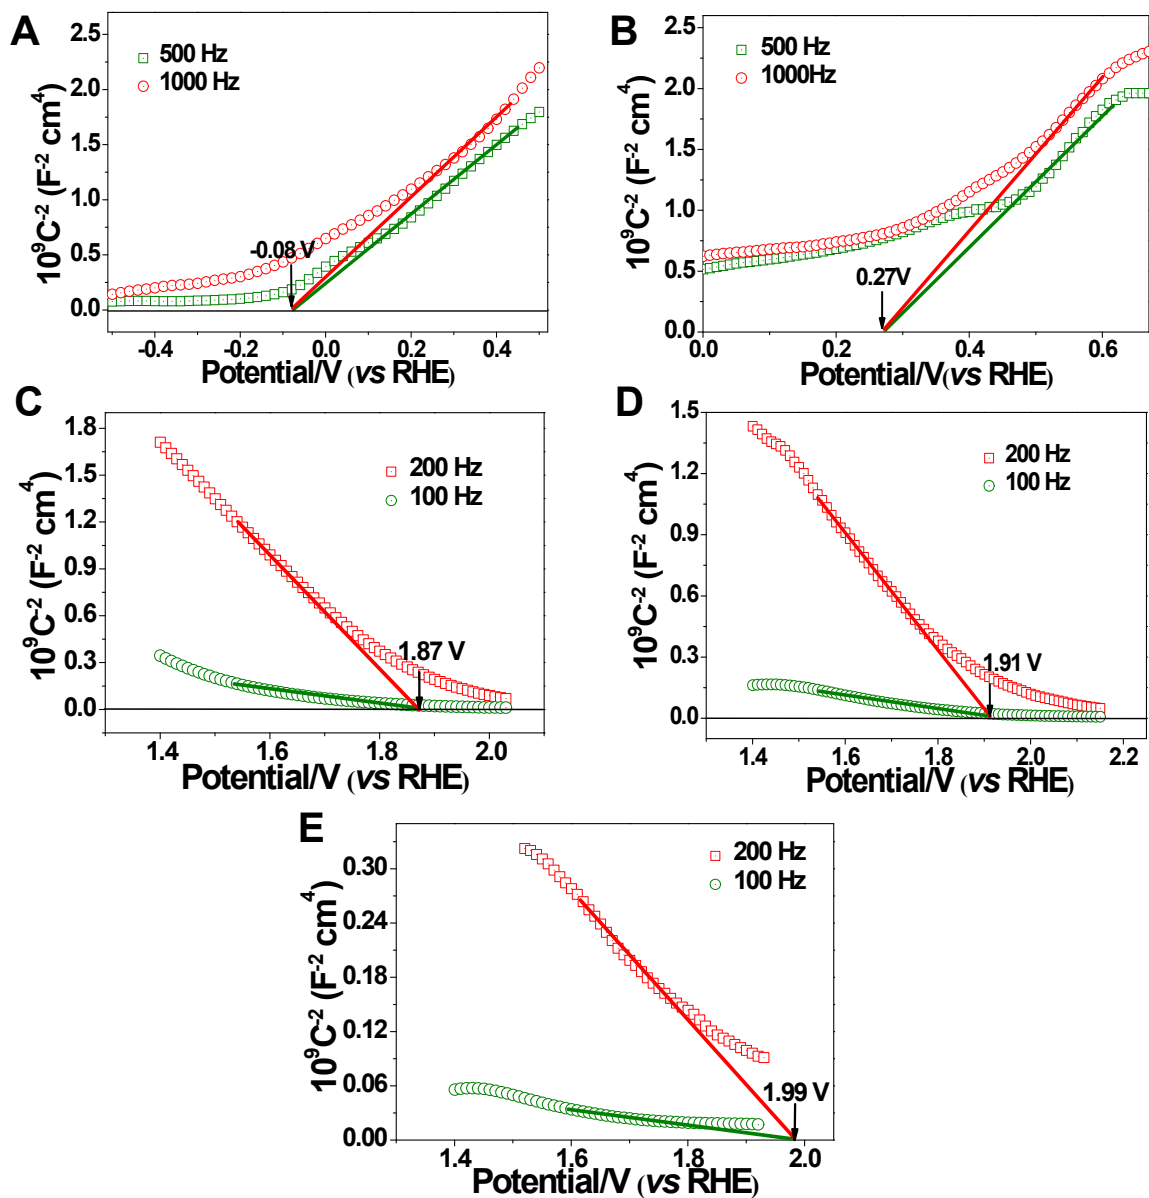

**Fig. S5.** Results of Mott-Schottky measurements for (A) undoped Au@CdS, (B) Cu(6.3)-Au@CdS, (C) Cu(14.7)-Au@CdS, (D) Cu(16.6)-Au@CdS and (E) Cu(18.9)-Au@CdS core-shell HNCs at different modulation frequencies.

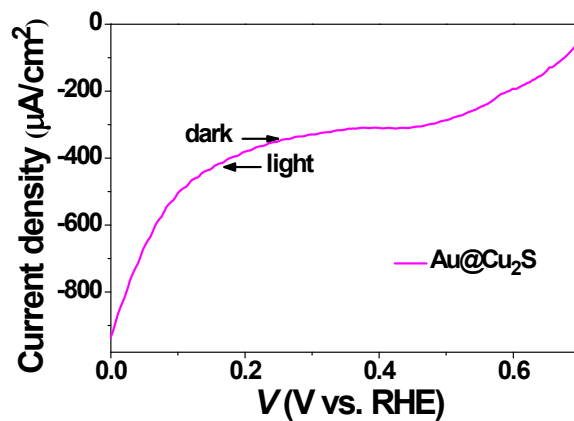

**Fig. S6.** Photocurrent density-potential curve for Au@Cu<sub>2</sub>S core-shell HNCs under simulated sunlight illumination (AM 1.5G, 100 mW cm<sup>-2</sup>) using a three-electrode configuration.

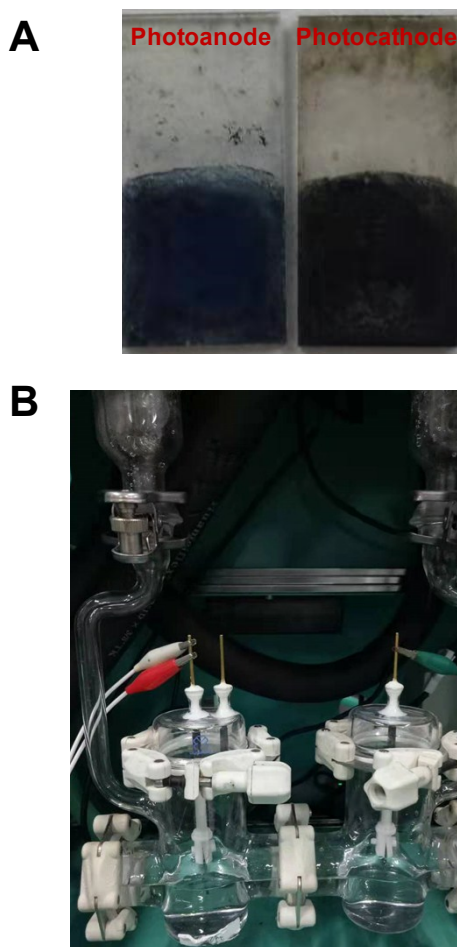

**Fig. S7.** Photographs of the IrO<sub>x</sub>/Au@CdS photoanode and NiS/Cu(14.7)-Au@CdS photocathode (A) and the constructed tandem PEC cell (B).

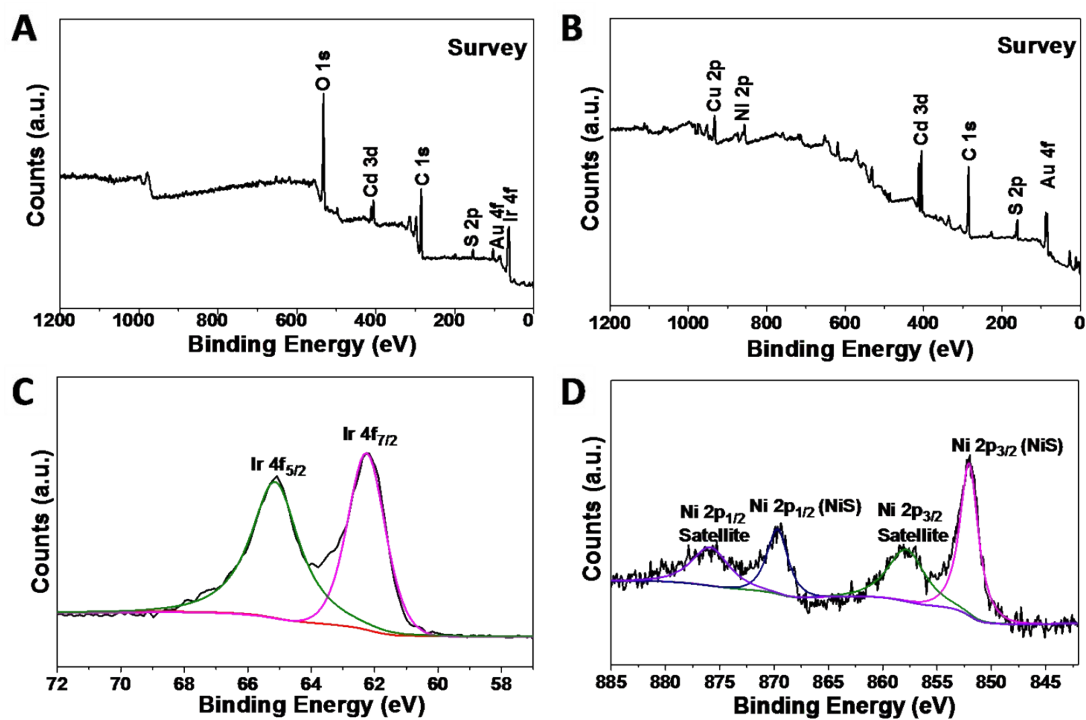

Fig. S8. XPS spectra for IrO<sub>x</sub>/Au@CdS photoanode (A,C) and NiS/Cu(14.7)-Au@CdS photocathode (B,D).



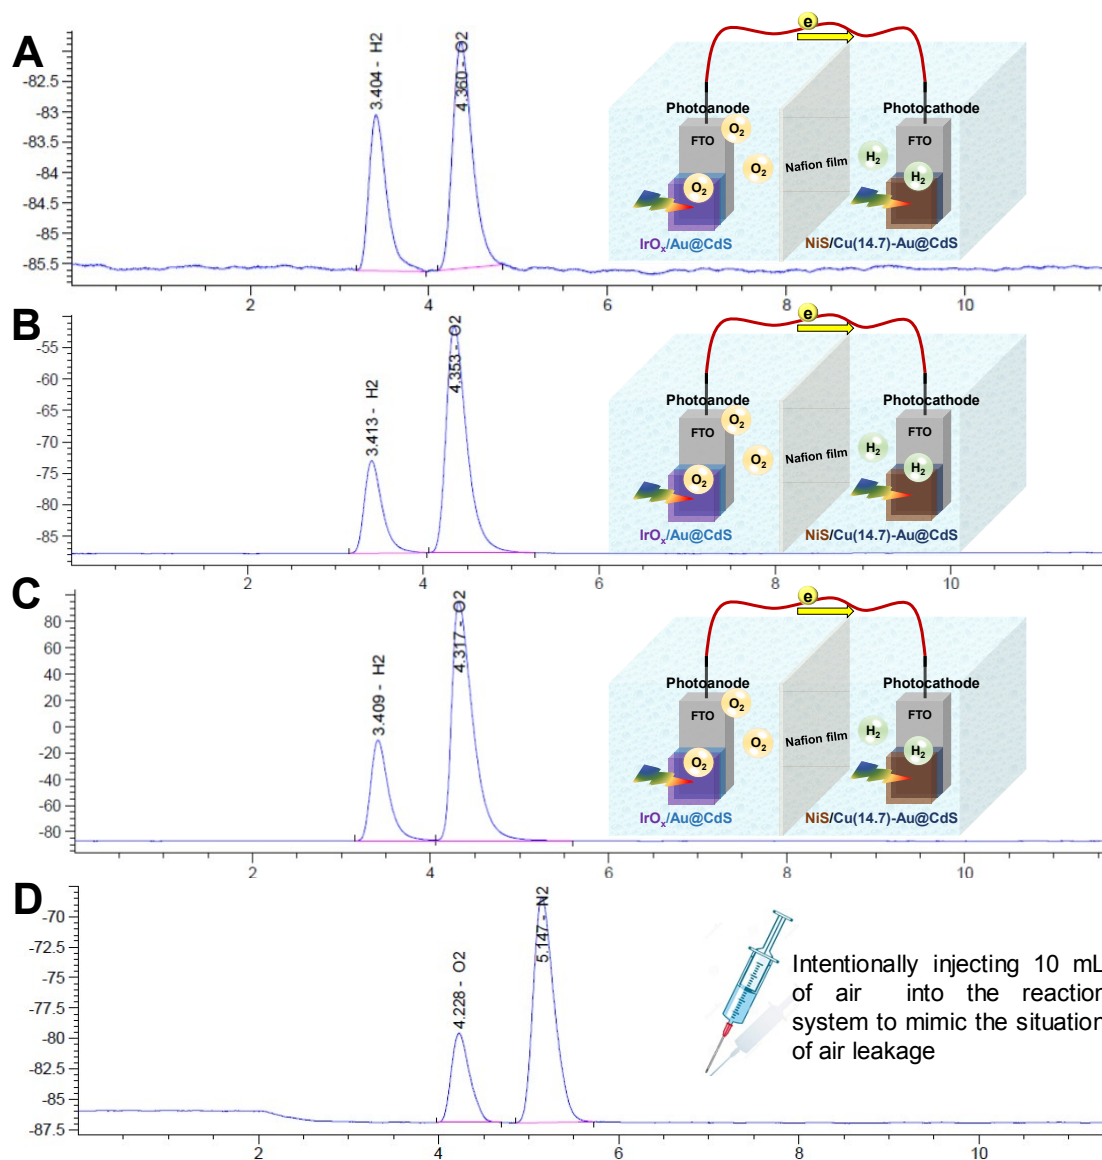

**Fig. S9.** (A-C) The original gas chromatographic data for the evolution of O<sub>2</sub> and H<sub>2</sub> over time generated by the constructed tandem PEC cell, where the peaks of H<sub>2</sub> and O<sub>2</sub> appeared at about 3 minutes and 4 minutes, respectively. (D) The data was measured by gas chromatograph after 10 mL of air was intentionally injected into the reaction system, where the peaks of O<sub>2</sub> and N<sub>2</sub> appeared at about 4 minutes and 5 minutes, respectively.

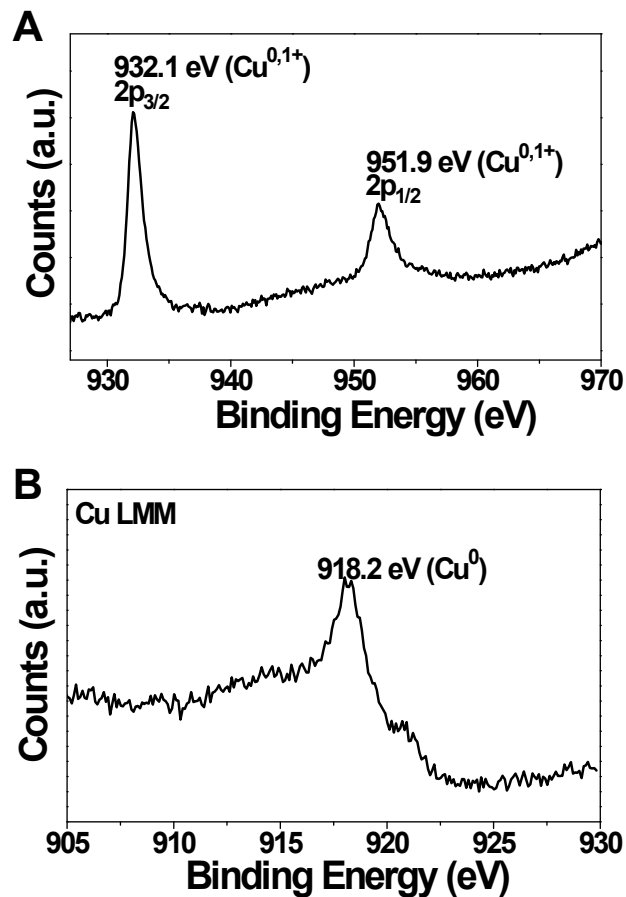

**Fig. S10.** XPS spectra of (A) Cu 2p and (B) Auger spectra of Cu LMM for the photocathode material (Cu(14.7)-Au@CdS HNCs decorated with NiS) of the constructed tandem PEC cell after PEC water splitting reaction. The results demonstrated that the vast majority of Cu in photocathode showed 0 valence,<sup>1,2</sup> suggesting that a considerable amount of accumulated electrons at the photocathode surface were consumed by the Cu dopant instead of the protons in solution to produce hydrogen.

## References

1 X. Y. Zhu, H. P. Rong, X. B. Zhang, Q. M. Di, H. S. Shang, B. Bai, J. J. Liu, J. Liu, M. Xu, W.

X. Chen and J. T. Zhang, *Nano res.*, 2019.

2 X. F. Dai, W. Xu, T. Zhang, H. B. Shi and T. Wang, *Chem. Eng. J.*, 2019, **364**, 310-319.
